# Supplementary material for: Lenvatinib plus anti-PD-1 antibodies as conversion therapy for patients with unresectable intermediate-advanced hepatocellular carcinoma: a single-arm, phase II trial
Source: PubMed Central journal article supplement — J Immunother Cancer. 2023 Sep 20;11(9):e007366. doi: 10.1136/jitc-2023-007366 (PMC10514649; doi:10.1136/jitc-2023-007366), 2023-09-20
Supplement: jitc-2023-007366supp002.pdf [file jitc-2023-007366supp002.pdf]

### ***Online-Only Supplement***

## **Supplement to: Wenwen Zhang et al. Lenvatinib plus anti-PD-1 antibodies as conversion therapy for patients with unresectable intermediate-advanced hepatocellular carcinoma: a single-arm, phase II trial**

### **Supplemental Methods**

#### **1 Conversion therapy**

All eligible patients received oral lenvatinib (12 mg for bodyweight  $\geq$  60 kg; 8 mg for bodyweight  $<$  60 kg) once daily and intravenous PD-1 inhibitors on day 1 of each 21-day treatment cycle. The anti-PD-1 antibodies and their single-dose infusion used in this study were sintilimab 200 mg, pembrolizumab 200 mg, tislelizumab 200 mg, or toripalimab 240 mg. The choice of anti-PD-1 antibodies was at the discretion of the patient.

If an adverse event occurred, interruption, discontinuation, or dose reduction was permitted for lenvatinib according to the trial protocol (appendix 1 pp 57-62); anti-PD-1 treatment was not dose reduced but interrupted or discontinued depending on tolerability. Treatment was resumed when protocol-defined criteria for treatment resumption were met. If hematological parameters did not recover on day 21 ( $\pm$ 3 days), the next treatment cycle could be postponed for up to two weeks. In addition to unacceptable toxicity, treatment discontinuation also included the withdrawal of consent, disease progression, non-compliance, or other reasons that the investigators deemed would significantly compromise the patient's safety.

#### **2 Surgery**

Resectability was assessed mainly based on liver function, vascular structure, and tumor response evaluated by independent imaging review (IIR) according to HCC-specific modified RECIST (mRECIST) every 6-8 weeks (the first assessment before the fourth cycle) until conversion success, disease progression, unacceptable toxicity, or for 48 weeks. The resectability criteria (i.e., criteria for conversion success) were defined based on the "Chinese expert consensus on conversion therapy of immune checkpoint inhibitors combined anti-angiogenic targeted drugs for advanced hepatocellular carcinoma (2021 Edition)" and our previous study.<sup>1,2</sup> The specific criteria were listed as follows.: 1) Child-Pugh class A or B; 2)

ECOG PS 0 or 1; 3) no extrahepatic lesions, extrahepatic lesions can be curatively resected, or extrahepatic lesions tend to be judged as inactive by the multidisciplinary team (MDT); 4) the estimated intact vascular structure of the reserved liver; and 5) the expected remnant liver volume  $\geq 35\%$  in patients without chronic liver disease and  $\geq 45\%$  in chronic liver disease patients.

Patients who satisfied the criteria for successful conversion were informed of the benefits and risks associated with surgery. Surgical treatment was performed after obtaining signed informed consent. Under the premise of radical resection, the type of surgery was chosen depending on the intraoperative exploration situation. Morbidity and mortality were monitored within 30 days following surgery. Post-hepatectomy liver failure was evaluated in accordance with the International Study Group of Liver Surgery criteria.<sup>3</sup> Post-operative complications were graded using the Clavien-Dindo classification.<sup>4</sup>

### **3 Post-operative management**

The pathological response of all resected specimens was evaluated and classified as pathological complete response (pCR; no viable tumor cells in the resection specimens, including completely resected primary tumors, tumor thrombosis, and lymph nodes), pathological partial response (pPR;  $\leq 50\%$  viable tumor cells in the primary tumor), and pathological non-response (pNR;  $> 50\%$  viable tumor cells in the primary tumor or appearance of new lesions).

At 2-4 weeks post-surgery, the patients with pCR were initiated with the PD-1 inhibitor monotherapy for  $\geq 6$  months, or until recurrence or unacceptable toxicity, whichever occurred first. Patients with pPR resumed the conversion therapy regimen for 6-12 months or until recurrence or unacceptable toxicity, whichever occurred first. Patients with pNR were treated with the regimes recommended by the MDT based on the results of the pathological examination and/or genetic testing. Tumors were assessed at 4 weeks after surgery, and every 12 weeks thereafter using the serum alpha-fetoprotein (AFP) level and imaging examination.

### **4 Clinical and radiographic assessment**

All patients were monitored through imaging examination utilizing contrast-enhanced

magnetic resonance imaging (MRI) or positron emission tomography-computed tomography (PET-CT). Tumor response was assessed by the investigators and IIR per RECIST 1.1 and mRECIST, respectively, and categorized as complete response (CR), partial response (PR), stable disease (SD), or progressive disease (PD). Objective response rate (ORR) was calculated as the percentage of patients achieving CR or PR, and disease control rate (DCR) as the proportion of patients with CR, PR, or SD. Overall survival (OS) was the time from the initiation of conversion therapy to death due to any cause. Progression-free survival (PFS) was the time between the onset of conversion therapy and PD, recurrence, or death, whichever event occurred first. Recurrence-free survival (RFS) was the time from the curative-intended surgery to recurrence or death, whichever appeared first. The duration of response was the interval from the first documented CR or PR until PD, recurrence, or death, whichever came first.

## **5 Safety assessment**

All patients underwent safety evaluations 14 days before initiating study treatment and within 3 days before the next treatment cycle. Adverse events and abnormal laboratory findings were assessed by the investigators following the National Cancer Institute (NCI) Common Terminology Criteria for Adverse Events (CTCAE) version 5.0.

## **6 Multiplex immunofluorescence**

Multiplex immunofluorescence (mIF) staining was performed using the Akoya OPAL Polaris 7-Color Automation IHC kit (NEL871001KT). Formalin-fixed paraffin-embedded (FFPE) tissue slides were incubated with specific primary antibodies targeting pan-CK (ab7753, 1:100, Abcam), CD8 (ab178089, 1:100, Abcam), CD56 (ab75813, 1:100, Abcam), CD68 (ab213363, 1:1000, Abcam), and HLA-DR (ab20181, 1:300, Abcam). This was followed by interaction with horseradish peroxidase-conjugated secondary antibody and tyramide signal amplification. The slides were heat-treated after each round of amplification. Cell nuclei were counterstained with 4', 6-diamidino-2-phenylindole. Multiplex stained slides were scanned, and all scans for each slide were merged to determine the relative localization of the proteins. The quantities of various cell populations were expressed as the percentage of positively

stained cells in all nucleated cells.

**Supplementary Table 1.** Detailed clinicopathological characteristics of all 56 eligible HCC patients.

| ID   | Initials | Smoke | Drink | HBV+ | HCV+ | ECOG PS | Child-pugh | BCLC stage | CNLC stage | Baseline AFP (ng/mL) | Extrahepatic metastasis | PVTT | HVTT | Prior therapy for HCC | local for conversion | Curative-intended surgery after | mIF testing |
|------|----------|-------|-------|------|------|---------|------------|------------|------------|----------------------|-------------------------|------|------|-----------------------|----------------------|---------------------------------|-------------|
| P001 | BHP      | no    | no    | yes  | no   | 0       | A          | C          | IIIb       | 216.7                | lymph node              | yes  | no   | no                    |                      | yes                             | yes         |
| P002 | CFJ      | yes   | no    | no   | no   | 0       | A          | C          | IIIa       | 17008                | no                      | yes  | no   | no                    |                      | yes                             | no          |
| P003 | CSZ      | yes   | yes   | NA   | NA   | 1       | A          | C          | IIIa       | 7.34                 | no                      | yes  | no   | surgery+TACE          |                      | no                              | no          |
| P004 | DGC      | yes   | yes   | yes  | no   | 1       | A          | C          | IIIb       | >1000                | lung                    | yes  | no   | no                    |                      | no                              | no          |
| P005 | DXF      | yes   | yes   | yes  | no   | 0       | A          | C          | IIIa       | 12947                | no                      | yes  | no   | no                    |                      | no                              | yes         |
| P006 | FDJ      | yes   | no    | yes  | no   | 0       | A          | C          | IIIa       | 5.01                 | no                      | yes  | yes  | no                    |                      | yes                             | no          |
| P007 | FGS      | yes   | yes   | no   | no   | 0       | A          | B          | IIb        | 11.96                | no                      | no   | no   | surgery               |                      | yes                             | no          |
| P008 | GBRZ     | no    | no    | yes  | no   | 0       | A          | C          | IIIa       | 60.82                | no                      | yes  | no   | no                    |                      | yes                             | no          |
| P009 | GHG      | yes   | yes   | yes  | no   | 0       | A          | C          | IIIa       | 41828                | no                      | yes  | no   | no                    |                      | no                              | yes         |
| P010 | GZ       | no    | no    | yes  | no   | 0       | A          | C          | IIIb       | 6.48                 | lymph node              | yes  | NA   | no                    |                      | no                              | no          |
| P011 | HB       | yes   | yes   | yes  | no   | 0       | A          | C          | IIIb       | 2859                 | lymph node              | yes  | no   | no                    |                      | no                              | no          |
| P012 | HGR      | yes   | no    | yes  | no   | 0       | A          | C          | IIIa       | 819.3                | no                      | yes  | no   | no                    |                      | no                              | yes         |
| P013 | HJY      | yes   | no    | yes  | no   | 0       | A          | C          | IIIa       | 9026                 | no                      | no   | yes  | no                    |                      | yes                             | yes         |
| P014 | HLJ      | no    | no    | yes  | no   | 0       | A          | C          | IIIa       | 1320                 | no                      | yes  | no   | no                    |                      | no                              | no          |
| P015 | HZJ      | yes   | yes   | yes  | no   | 0       | A          | C          | IIIa       | 14.63                | no                      | yes  | yes  | no                    |                      | no                              | no          |
| P016 | LBM      | yes   | yes   | yes  | no   | 0       | A          | C          | IIIa       | 430.3                | no                      | yes  | no   | no                    |                      | yes                             | yes         |
| P017 | LF       | yes   | yes   | yes  | no   | 1       | A          | C          | IIIa       | 12.87                | no                      | no   | yes  | no                    |                      | no                              | no          |
| P018 | LMX      | yes   | yes   | yes  | no   | 0       | A          | C          | IIIa       | 4.74                 | no                      | yes  | no   | no                    |                      | no                              | yes         |
| P019 | LSS      | no    | no    | yes  | no   | 0       | A          | C          | IIIa       | 542.2                | no                      | yes  | no   | no                    |                      | no                              | no          |
| P020 | LST      | no    | no    | yes  | no   | 0       | A          | C          | IIIa       | 426.9                | no                      | yes  | no   | no                    |                      | no                              | no          |
| P021 | LSY      | no    | yes   | yes  | no   | 0       | A          | C          | IIIa       | 31797                | no                      | yes  | no   | no                    |                      | Yes                             | yes         |
| P022 | LXC      | no    | no    | yes  | no   | 0       | A          | C          | IIIb       | 86.78                | lymph node              | yes  | no   | no                    |                      | yes                             | no          |
| P023 | MQC      | no    | yes   | yes  | no   | 0       | A          | C          | IIIb       | >60500               | lung                    | yes  | no   | no                    |                      | no                              | no          |
| P024 | MYH      | yes   | yes   | yes  | no   | 0       | A          | C          | IIIa       | 33.78                | no                      | yes  | no   | no                    |                      | no                              | yes         |
| P025 | PMY      | no    | no    | yes  | yes  | 0       | A          | C          | IIIa       | 338.4                | no                      | yes  | no   | no                    |                      | no                              | no          |
| P026 | QJF      | no    | no    | yes  | no   | 0       | A          | C          | IIIa       | >60500               | no                      | yes  | no   | no                    |                      | no                              | no          |
| P027 | QSM      | yes   | yes   | yes  | no   | 0       | A          | C          | IIIa       | 56.9                 | no                      | yes  | yes  | no                    |                      | no                              | no          |

|      |      |     |     |     |     |   |    |   |      |        |            |     |     |         |     |     |
|------|------|-----|-----|-----|-----|---|----|---|------|--------|------------|-----|-----|---------|-----|-----|
| P028 | SG   | yes | no  | no  | yes | 0 | A  | C | IIIb | 20.33  | lymph node | no  | no  | no      | no  | no  |
| P029 | SHN  | no  | no  | yes | no  | 0 | A  | C | IIIb | 45544  | lymph node | yes | no  | no      | no  | no  |
| P030 | SKM  | no  | no  | yes | no  | 0 | A  | C | IIIa | 961.7  | no         | yes | no  | no      | no  | no  |
| P031 | SLM  | no  | no  | yes | no  | 0 | A  | C | IIIa | 22.42  | no         | yes | no  | no      | no  | no  |
| P032 | SXL  | yes | F   | yes | no  | 1 | NA | C | IIIa | >60500 | no         | yes | no  | no      | no  | no  |
| P033 | SY   | yes | yes | yes | NA  | 0 | A  | C | IIIa | 20.91  | no         | yes | no  | no      | no  | yes |
| P034 | SYP  | yes | yes | yes | no  | 0 | A  | C | IIIa | 2660   | no         | yes | no  | no      | yes | no  |
| P035 | TM   | no  | no  | yes | no  | 0 | A  | C | IIIa | 2.26   | no         | yes | no  | surgery | yes | no  |
| P036 | TSQ  | yes | no  | yes | no  | 0 | A  | C | IIIa | >60500 | no         | yes | no  | no      | yes | yes |
| P037 | WAF  | no  | no  | yes | no  | 0 | A  | C | IIIb | 436.6  | lymph node | no  | yes | no      | yes | yes |
| P038 | WJS  | no  | no  | yes | no  | 0 | B  | C | IIIa | >60500 | no         | yes | NA  | no      | no  | no  |
| P039 | WL   | NA  | no  | yes | NA  | 0 | A  | C | IIIa | 33577  | no         | yes | no  | no      | no  | no  |
| P040 | WLJ  | no  | yes | yes | no  | 0 | A  | C | IIIb | 448.3  | lung       | yes | no  | no      | no  | no  |
| P041 | WXIL | yes | no  | yes | yes | 0 | A  | C | IIIb | 7058   | lymph node | yes | no  | no      | yes | yes |
| P042 | WXJ  | yes | no  | yes | no  | 0 | A  | C | IIIa | >60500 | no         | yes | no  | no      | no  | Yes |
| P043 | WXL  | yes | yes | yes | no  | 0 | A  | C | IIIa | 4.27   | no         | yes | no  | no      | no  | no  |
| P044 | WZQ  | no  | no  | yes | no  | 0 | A  | C | IIIb | 17020  | lymph node | no  | yes | no      | yes | yes |
| P045 | YSP  | no  | no  | NA  | yes | 0 | A  | C | IIIb | NA     | lymph node | yes | no  | no      | yes | yes |
| P046 | YYB  | yes | yes | yes | no  | 0 | A  | C | IIIb | 3033   | lymph node | yes | no  | no      | no  | yes |
| P047 | ZCH  | yes | no  | yes | no  | 0 | A  | C | IIIa | 789    | no         | yes | no  | no      | yes | yes |
| P048 | ZHF  | no  | no  | yes | no  | 0 | A  | C | IIIb | 960.4  | lymph node | yes | yes | no      | yes | no  |
| P049 | ZJY  | yes | no  | yes | no  | 0 | A  | C | IIIa | 5440   | no         | yes | no  | no      | no  | yes |
| P050 | ZNZ  | no  | no  | yes | no  | 0 | A  | C | IIIa | 14.1   | no         | yes | no  | no      | no  | yes |
| P051 | ZXC  | NA  | NA  | yes | no  | 0 | A  | C | IIIa | >60500 | no         | yes | no  | no      | no  | no  |

|      |      |     |     |     |     |   |    |   |      |       |            |     |     |    |     |    |
|------|------|-----|-----|-----|-----|---|----|---|------|-------|------------|-----|-----|----|-----|----|
| P052 | ZXJ  | yes | no  | no  | no  | 0 | A  | C | IIIb | 4381  | lymph node | no  | yes | no | no  | no |
| P053 | ZXJG | yes | yes | yes | no  | 0 | A  | C | IIIa | 1398  | no         | yes | no  | no | no  | no |
| P054 | ZXL  | yes | no  | yes | no  | 0 | A  | B | IIb  | 1060  | no         | no  | no  | no | yes | no |
| P055 | ZXP  | no  | no  | yes | no  | 0 | A  | C | IIIa | 22.8  | no         | no  | yes | no | yes | no |
| P056 | ZYH  | no  | yes | no  | yes | 0 | NA | C | IIIa | 24246 | no         | yes | no  | no | yes | no |

Abbreviations: HCC, hepatocellular carcinoma; HBV, hepatitis B virus; HCV, hepatitis C virus; ECOG, Eastern Cooperative Oncology Group; PS: performance status; BCLC, Barcelona Clinic Liver Cancer; CNLC: China Liver Cancer; AFP: alpha-fetoprotein; PVTT, portal vein tumor thrombus; HVTT, hepatic vein tumor thrombosis; mIF: multiplex immunofluorescence.

**Supplementary Table 2.** Summary of overall response in 56 HCC patients receiving lenvatinib plus PD-1 inhibitors.

| Parameter                    | HCC-specific mRECIST |              | RECIST 1.1 |              |
|------------------------------|----------------------|--------------|------------|--------------|
|                              | IIR                  | investigator | IIR        | investigator |
| Objective response           | 30 (53.6)            | 33 (58.9)    | 25 (44.6)  | 26 (46.4)    |
| Complete response            | 5 (8.9)              | 12 (21.4)    | 1 (1.8)    | 1 (1.8)      |
| Partial response             | 25 (44.6)            | 21 (37.5)    | 24 (42.9)  | 25 (44.6)    |
| Stable disease               | 14 (25.0)            | 9 (16.1)     | 19 (33.9)  | 19 (33.9)    |
| Disease control <sup>a</sup> | 44 (78.6)            | 42 (75.0)    | 44 (78.6)  | 45 (80.4)    |
| Progressive disease          | 7 (12.5)             | 8 (14.3)     | 10 (17.9)  | 9 (16.1)     |
| Could not be evaluated       | 4 (7.1)              | 5 (8.9)      | 1 (1.8)    | 1 (1.8)      |
| Data missing                 | 1 (1.8)              | 1 (1.8)      | 1 (1.8)    | 1 (1.8)      |

Data presented as no. (%).

<sup>a</sup>Disease control included complete response, partial response, and stable disease.

Abbreviations: IIR, independent imaging review; mRECIST, modified Response Evaluation

Criteria in Solid Tumors; RECIST, Response Evaluation Criteria in Solid Tumors.



**Supplementary Table 3** The characteristics of 21 conversion resection patients during the perioperative period.

| Characteristics                           | Successful conversion |
|-------------------------------------------|-----------------------|
| Before surgery                            |                       |
| Days from systemic therapy to surgery     | 109 (77, 219)         |
| Lenvatinib withdrawal days before surgery | 5 (2, 7)              |
| Hepatectomy                               |                       |
| Number of hepatic segment excision        |                       |
| 1                                         | 2 (9.5%)              |
| 2                                         | 4 (19.0%)             |
| ≥3                                        | 15 (71.4%)            |
| Portal vein thrombectomy                  | 7 (33.3%)             |
| Hepatic vein thrombectomy                 | 3 (14.3%)             |
| Retroperitoneal lymph node dissection     | 1 (4.8%)              |
| Operation time (min)                      | 260 (200, 390)        |
| Intraoperative blood loss (mL)            | 500 (50, 2400)        |
| Intraoperative blood transfusion          | 6 (28.6%)             |
| Blood transfusion volume (mL)             | 837.5 (450, 980)      |
| After surgery                             |                       |
| Child-Pugh score (5 days post-surgery)    |                       |
| A                                         | 18 (85.7%)            |
| B                                         | 3 (14.3%)             |
| Clavin-Dindo classification               |                       |
| I                                         | 1 (4.8%)              |
| III                                       | 2 (9.5%)              |
| Post-hepatectomy liver failure            |                       |
| A                                         | 4 (19.0%)             |
| Post-operative hospital stay, days        | 10 (5,33)             |
| Pathological response                     |                       |
| pCR                                       | 8 (38.1%)             |
| pPR                                       | 9 (42.9%)             |
| pNR                                       | 4 (19.0%)             |

Data presented as median (minimum-maximum) or no. (%).

Abbreviations: pCR, pathological complete response; pPR; pathological partial response;

pNR, pathological non-response.

**Supplementary Table 4** Univariate and multivariate analysis of the variables associated with PFS and OS in 56 HCC patients receiving lenvatinib plus PD-1

inhibitors.

| Parameter                                     | PFS                  |         | OS                     |              |
|-----------------------------------------------|----------------------|---------|------------------------|--------------|
|                                               | Univariable analysis |         | Multivariable analysis |              |
|                                               | HR (95% CI)          | P value | HR (95%CI)             | P value      |
| Age ( $\geq 60$ vs. $<60$ )                   | 0.56 (0.28-1.14)     | 0.108   |                        |              |
| Sex (female vs. male)                         | 1.29 (0.50-3.31)     | 0.595   |                        |              |
| Smoke (no vs. yes)                            | 1.07 (0.57-2.00)     | 0.829   |                        |              |
| Drink (no vs. yes)                            | 1.50 (0.80-2.79)     | 0.204   |                        |              |
| HBV infection (no vs. yes)                    | 0.62 (0.22-1.76)     | 0.37    |                        |              |
| HCV infection (no vs. yes)                    | 2.01 (0.68-5.94)     | 0.205   |                        |              |
| Baseline AFP (<400ng/ml vs. $\geq 400$ ng/ml) | 2.21 (1.12-4.35)     | 0.022   | 2.33 (1.17-4.61)       | <b>0.016</b> |
| Hepatic cyst (no vs. yes)                     | 0.52 (0.18-1.47)     | 0.215   |                        |              |
| Extrahepatic disease (no vs. yes)             | 0.92 (0.50-1.67)     | 0.78    |                        |              |
| Concomitant medication (no vs. yes)           | 1.08 (0.52-2.27)     | 0.833   |                        |              |
| ECOG PS (0 vs. 1)                             | 0.75 (0.23-2.43)     | 0.631   |                        |              |
| TNM stage (III vs. IV)                        | 0.90 (0.49-1.66)     | 0.731   |                        |              |
| Extrahepatic metastasis                       |                      |         |                        |              |
| no vs. Lymph node                             | 1.00 (0.47-2.12)     | 0.998   |                        |              |
| no vs. lung                                   | 1.79 (0.54-5.96)     | 0.341   |                        |              |
| Multiple foci (single vs. multiple)           | 2.00 (1.09-3.67)     | 0.024   | 2.49 (1.30-4.76)       | <b>0.006</b> |
| BCLC stage (B vs. C)                          | 0.99 (0.24-4.13)     | 0.994   |                        |              |

|                                 |                  |              |                         |                  |                         |
|---------------------------------|------------------|--------------|-------------------------|------------------|-------------------------|
| CNLC stage                      |                  |              |                         |                  |                         |
| I Ib vs. IIIa                   | 0.96 (0.23-4.05) | 0.96         | /                       | /                |                         |
| I Ib vs. IIIb                   | 1.09 (0.24-4.91) | 0.913        | /                       | /                |                         |
| Vascular invasion               | 0.99 (0.24-4.13) | 0.994        | /                       | /                |                         |
| PVTT (no vs. yes)               | 1.73 (0.73-4.10) | 0.215        | 3.43 (0.81-14.44)       | 0.093            |                         |
| HVTT (no vs. yes)               | 0.26 (0.06-1.06) | 0.061        | 0.00 (0.00-Inf)         | 0.997            |                         |
| Vp status (no vs. yes)          |                  |              |                         |                  |                         |
| Vp2 vs. Vp3                     | 0.65 (0.21-2.03) | 0.457        | 0.71 (0.19-2.68)        | 0.611            |                         |
| Vp2 vs. Vp4                     | 0.88 (0.30-2.61) | 0.821        | 1.24 (0.36-4.26)        | 0.736            |                         |
| Vv status (Vv2 vs. Vv3)         | 0.94 (0.34-2.66) | 0.913        | 0.44 (0.10-2.01)        | 0.29             |                         |
| Conversion success (no vs. yes) | 0.37 (0.20-0.69) | <b>0.002</b> | <b>0.29 (0.15-0.57)</b> | <b>&lt;0.001</b> | <b>0.31 (0.15-0.66)</b> |

<sup>/</sup>There were too few events to conduct a reliable analysis.

PFS was assessed by IIR according to mRECIST.

Abbreviations: HBV, hepatitis B virus; HCV, hepatitis C virus; AFP: alpha-fetoprotein; ECOG, Eastern Cooperative Oncology Group; PS: performance status;

TNM, tumor-node-metastasis; BCLC, Barcelona Clinic Liver Cancer; CNLC: China Liver Cancer; PVTT, portal vein tumor thrombus; HVTT, hepatic vein

tumor thrombosis; Vp, portal vein invasion; Vv, venous invasion; PFS, progression-free survival; OS, overall survival; IIR, independent imaging review;

mRECIST, modified Response Evaluation Criteria in Solid Tumors.

**Supplementary Table 5** Treatment-related adverse events in 56 HCC patients receiving lenvatinib plus PD-1 inhibitors

| Clinical characteristics            | Lenvatinib plus PD-1 inhibitors |            |            |          |                       |
|-------------------------------------|---------------------------------|------------|------------|----------|-----------------------|
|                                     | Any grade                       | Grade 1-2  | Grade 3    | Grade 4  | Grade 5               |
| Any treatment-related adverse event | 50 (89.3%)                      | 43 (76.8%) | 22 (39.3%) | 1 (1.8%) | 2 (3.6%) <sup>a</sup> |
| Rash                                | 17 (30.4%)                      | 15 (26.8%) | 2 (3.6%)   |          |                       |
| Hand-foot syndrome                  | 16 (28.6%)                      | 12 (21.4%) | 4 (7.1%)   |          |                       |
| Fever                               | 7 (12.5%)                       | 6 (10.7%)  | 1 (1.8%)   |          |                       |
| Nausea                              | 6 (10.7%)                       | 6 (10.7%)  |            |          |                       |
| Proteinuria                         | 5 (8.9%)                        | 5 (8.9%)   |            |          |                       |
| Abdominal pain                      | 5 (8.9%)                        | 5 (8.9%)   |            |          |                       |
| Diarrhea                            | 5 (8.9%)                        | 4 (7.1%)   | 1 (1.8%)   |          |                       |
| Hypothyroidism                      | 4 (7.1%)                        | 4 (7.1%)   |            |          |                       |
| Hypertension                        | 9 (16.1%)                       | 3 (5.4%)   | 6 (10.7%)  |          |                       |
| Blood bilirubin increased           | 4 (7.1%)                        | 2 (3.6%)   | 2 (3.6%)   |          |                       |
| Epistaxis                           | 3 (5.4%)                        | 2 (3.6%)   | 1 (1.8%)   |          |                       |
| Myalgia                             | 2 (3.6%)                        | 2 (3.6%)   |            |          |                       |
| Cough                               | 2 (3.6%)                        | 2 (3.6%)   |            |          |                       |
| Fatigue                             | 2 (3.6%)                        | 2 (3.6%)   |            |          |                       |
| Periodontal disease                 | 7 (12.5%)                       | 1 (1.8%)   | 6 (10.7%)  |          |                       |
| Hypoalbuminemia                     | 1 (1.8%)                        | 1 (1.8%)   |            |          |                       |
| Lung infection                      | 1 (1.8%)                        | 1 (1.8%)   |            |          |                       |
| Edema limbs                         | 1 (1.8%)                        | 1 (1.8%)   |            |          |                       |
| Floaters                            | 1 (1.8%)                        | 1 (1.8%)   |            |          |                       |
| Pharyngolaryngeal pain              | 1 (1.8%)                        | 1 (1.8%)   |            |          |                       |
| Intracranial hemorrhage             | 1 (1.8%)                        | 1 (1.8%)   |            |          |                       |
| Hoarseness                          | 1 (1.8%)                        | 1 (1.8%)   |            |          |                       |
| Mammogenesis                        | 1 (1.8%)                        | 1 (1.8%)   |            |          |                       |
| Leukocytosis                        | 1 (1.8%)                        | 1 (1.8%)   |            |          |                       |
| Shingles                            | 1 (1.8%)                        | 1 (1.8%)   |            |          |                       |
| Cholecystitis                       | 1 (1.8%)                        | 1 (1.8%)   |            |          |                       |
| Hypohepatia                         | 1 (1.8%)                        | 1 (1.8%)   |            |          |                       |
| Increased aminotransferases         | 1 (1.8%)                        | 1 (1.8%)   |            |          |                       |
| Hematuria                           | 1 (1.8%)                        | 1 (1.8%)   |            |          |                       |
| Autoimmune disorder                 | 2 (3.6%)                        |            | 1 (1.8%)   | 1 (1.8%) |                       |
| Unknown death                       |                                 |            |            |          | 2 (3.6%)              |
| Liver dysfunction                   | 1 (1.8%)                        |            | 1 (1.8%)   |          |                       |
| Psoriasis                           | 1 (1.8%)                        |            | 1 (1.8%)   |          |                       |
| Gingival bleeding                   | 1 (1.8%)                        |            | 1 (1.8%)   |          |                       |
| Platelet count decreased            | 1 (1.8%)                        |            | 1 (1.8%)   |          |                       |
| Arthralgia                          | 1 (1.8%)                        |            | 1 (1.8%)   |          |                       |

Data presented as no. (%).

<sup>a</sup>Two patients who experienced grade 5 treatment-related adverse events died during or after the treatment, and the causes of death were unknown. Thus, the relation to treatment could not be ruled out.

**Supplementary Figure 1** Kaplan-Meier curves of PFS (A) and OS (B) of 31 conversion success patients stratified by post-operative therapy strategies.

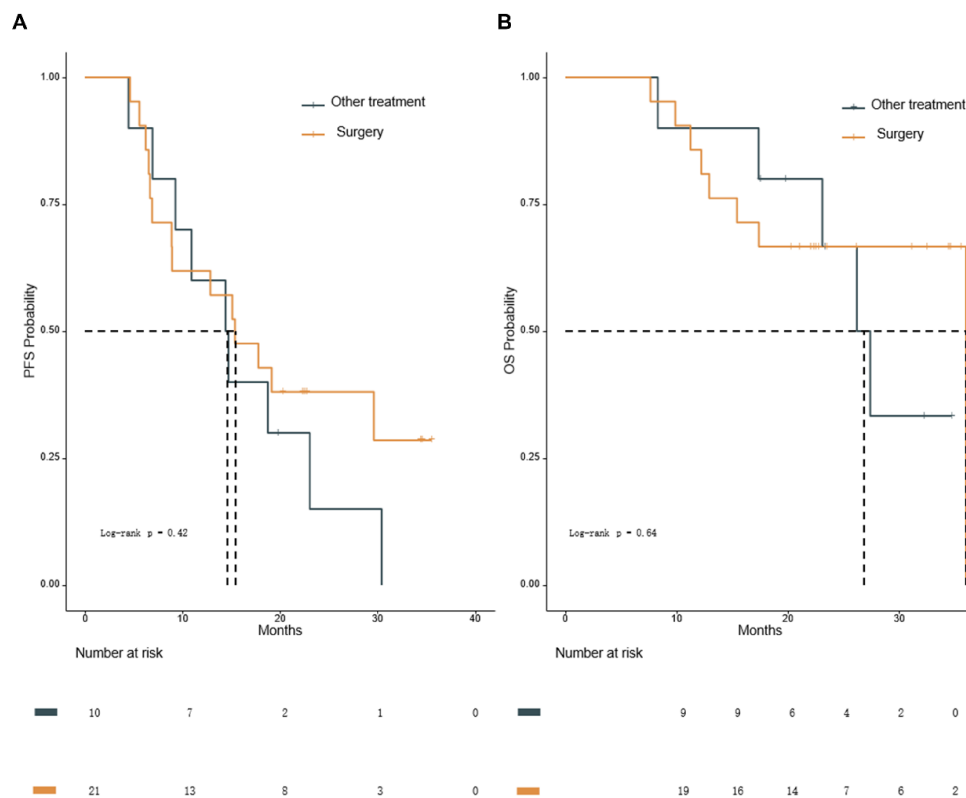

PFS was assessed by IIR according to mRECIST.

Abbreviations: PFS, progression-free survival; OS, overall survival; IIR, independent imaging review; mRECIST, modified Response Evaluation Criteria in Solid Tumors.

**Supplementary Figure 2** Kaplan-Meier estimates of RFS (A) and post-operative OS (B) of

21 HCC patients with conversion resection

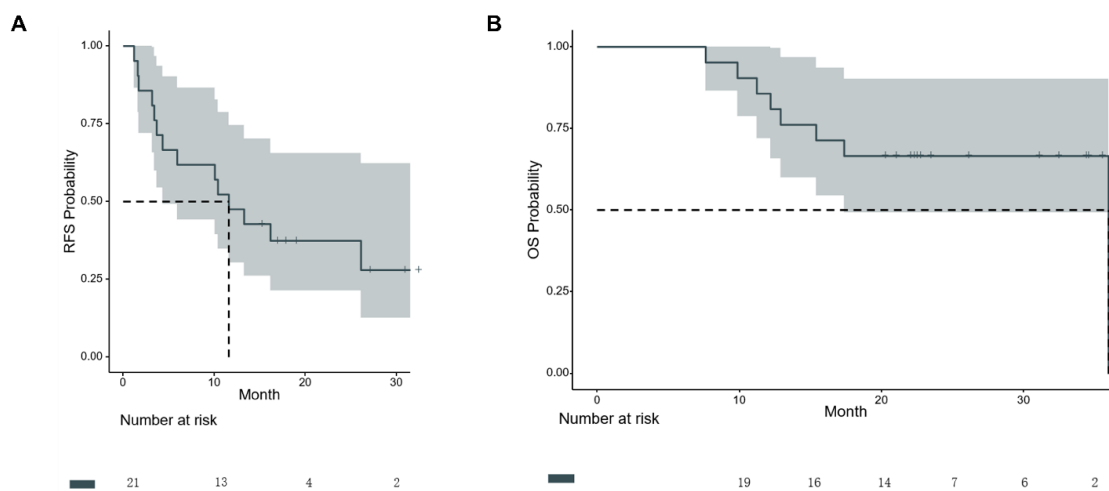

RFS assessment by IIR according to mRECIST.

Abbreviations: RFS: recurrence-free survival; OS, overall survival; IIR, independent imaging

review; mRECIST, modified Response Evaluation Criteria in Solid Tumors.

**Supplementary Figure 3** Kaplan-Meier estimates of RFS (A and C) and post-operative OS (B and D) of 21 conversion resection patients stratified by post-conversion AFP level and surgical margin.

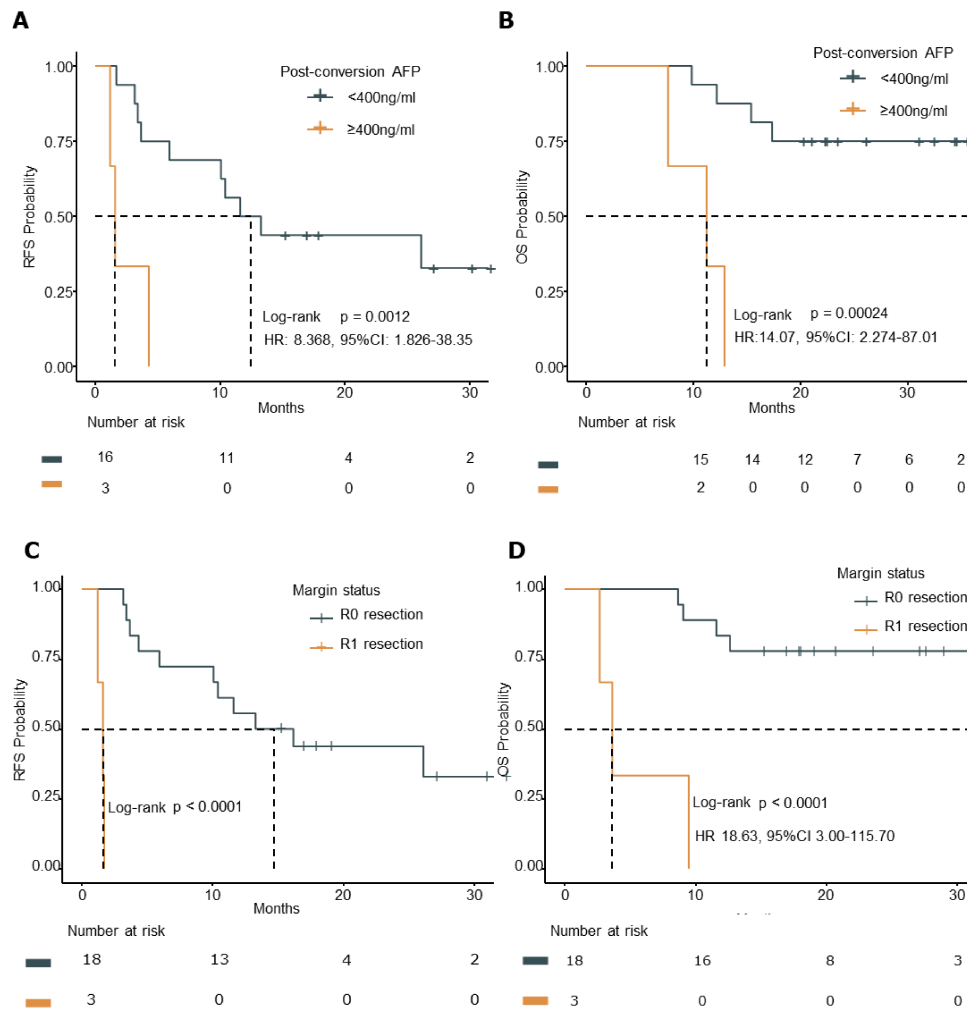

RFS was assessed by IIR according to mRECIST

Abbreviations: RFS: recurrence-free survival; OS, overall survival; IIR, independent imaging review; mRECIST, modified Response Evaluation Criteria in Solid Tumors.

**Supplementary Figure 4** The effects of extrahepatic metastasis on conversion success rate

and post-operative survival in 56 patients receiving lenvatinib plus PD-1 inhibitors.

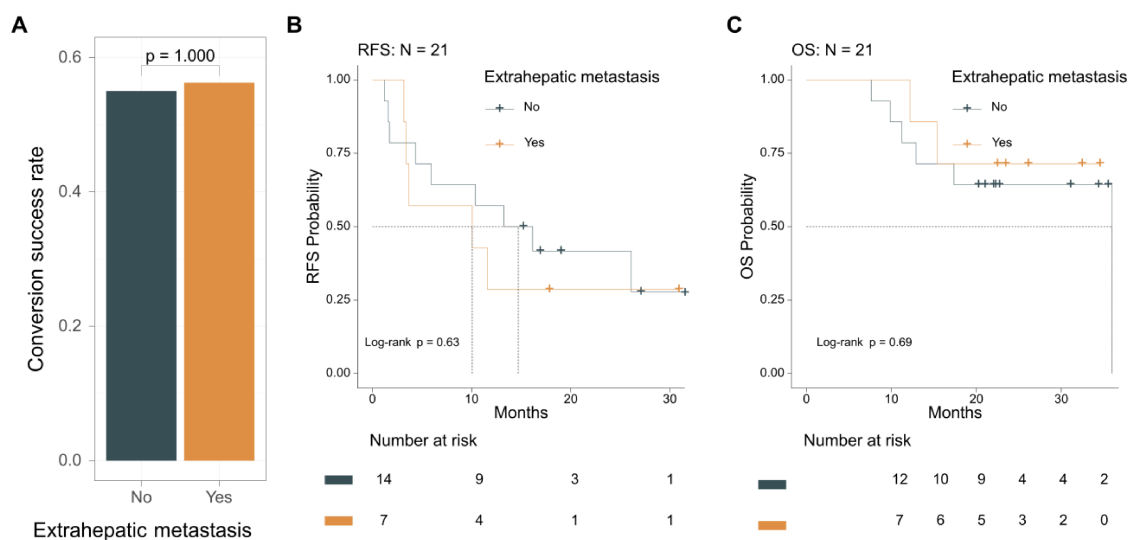

(A) The conversion success rate of patients with or without extrahepatic metastasis following therapy with lenvatinib plus PD-1 inhibitors. (B and C) Kaplan-Meier curves for RFS (B) and post-operative OS (C) of conversion resection patients stratified by extrahepatic metastasis.

RFS was assessed by IIR according to mRECIST

Abbreviations: RFS: recurrence-free survival; OS, overall survival; IIR, independent imaging review; mRECIST, modified Response Evaluation Criteria in Solid Tumors.

## References

- [1] Zhang W, B Hu, J Han, Z Wang, G Ma, H Ye, et al. Surgery after conversion therapy with PD-1 inhibitors plus tyrosine kinase inhibitors are effective and safe for advanced hepatocellular carcinoma: a pilot study of ten patients. *Frontiers in Oncology*. 11 (2021).
- [2] Cao J, W Zhang, H-T Zhao, X Bi. Chinese expert consensus on conversion therapy of immune checkpoint inhibitors combined antiangiogenic targeted drugs for advanced



hepatocellular carcinoma (2021 Edition). *Electronic Journal of Liver Tumor*. 8 (2021) 9.

[3] Rahbari NN, OJ Garden, R Padbury, M Brooke-Smith, M Crawford, R Adam, et al.

Posthepatectomy liver failure: a definition and grading by the International Study Group of Liver Surgery (ISGLS). *Surgery*. 149 (2011) 713-24.

[4] Dindo D, N Demartines, P-A Clavien. Classification of surgical complications: a new proposal with evaluation in a cohort of 6336 patients and results of a survey. *Annals of surgery*. 240 (2004) 205.
